# Supplementary material for: Applying Quality Improvement Methodology to Standardize Pediatric Urinary Tract Infection Diagnosis and Management throughout a Healthcare System
Source: PubMed Central journal article supplement (PMC11338250; doi:10.1097/pq9.0000000000000756), 2024-08-21
Supplement: pqs-9-e756-s002.pdf [file pqs-9-e756-s002.pdf]

Supplemental Data – ICD-10 Diagnosis Codes Used in Data Analysis for Suspected UTI, Exclusion Parameters, and Return Visits

**Suspected UTI Diagnosis Codes:**

|                                                             |                      |
|-------------------------------------------------------------|----------------------|
| Dysuria                                                     | R30.0                |
| Fever in pediatric patient                                  | R50.9                |
| Urinary frequency                                           | R35.0                |
| Generalized abdominal pain                                  | R10.84               |
| Unspecified abdominal pain                                  | R10.9                |
| Acute cystitis without hematuria                            | N30.00               |
| Acute cystitis with hematuria                               | N30.01               |
| Urinary tract infection without hematuria, site unspecified | N39.0                |
| Lower abdominal pain                                        | R10.30               |
| Urinary incontinence, unspecified type                      | R32                  |
| Right lower quadrant abdominal pain                         | R10.31               |
| Hematuria, unspecified type                                 | R31.9                |
| Painful urination                                           | R30.9                |
| Pyelonephritis                                              | N12                  |
| Periumbilical abdominal pain                                | R10.33               |
| Cystitis                                                    | N30.90               |
| Retention of urine, unspecified                             | R33.9                |
| Urinary tract infection with hematuria, site unspecified    | N39.0, R31.9         |
| Urinary urgency                                             | R39.15               |
| Left lower quadrant abdominal pain                          | R10.32               |
| Gross hematuria                                             | R31.0                |
| Foul smelling urine                                         | R82.90               |
| Acute pyelonephritis                                        | N10                  |
| Chronic abdominal pain                                      | R10.9, G89.29        |
| Fussy infant                                                | R68.12               |
| Cystitis with hematuria                                     | N30.91               |
| Fussiness in child > 1 year old                             | R45.89               |
| Bacteriuria                                                 | R82.71               |
| Frequency of urination and polyuria                         | R35.0, R35.89        |
| Other retention of urine                                    | R33.8                |
| Combined abdominal pain, vomiting, and diarrhea             | R10.9, R19.7, R11.10 |
| Pyuria                                                      | R82.81               |
| Abdominal pain, vomiting, and diarrhea                      | R10.9, R11.10, R19.7 |
| Upper abdominal pain, unspecified                           | R10.10               |
| History of gross hematuria                                  | Z87.898              |
| History of pyelonephritis                                   | Z87.448              |
| E. coli UTI                                                 | N39.0, B96.20        |
| Hematuria with proteinuria                                  | R31.9, R80.9         |
| Abdominal pain with vomiting                                | R10.9, R11.10        |
| UTI due to Klebsiella species                               | N39.0, B96.89        |
| Nonobstructive reflux-associated chronic pyelonephritis     | N11.0                |
| Bilateral groin pain                                        | R10.31, R10.32       |
| Frequent urination at night                                 | R35.1                |
| Urinary tract bacterial infections                          | N39.0, A49.9         |

|                                                                                                   |                        |
|---------------------------------------------------------------------------------------------------|------------------------|
| Septic shock due to urinary tract infection                                                       | A41.9, R65.21, N39.0   |
| Urinary tract infection due to extended-spectrum beta lactamase (ESBL) producing Escherichia coli | N39.0, B96.29, Z16.12  |
| Idiopathic hematuria, unspecified whether glomerular morphologic changes present                  | N02.9                  |
| Hypercalciuria                                                                                    | R82.994                |
| Chronic RLQ pain                                                                                  | R10.31, G89.29         |
| Tubulointerstitial nephritis and uveitis                                                          | N12, H22               |
| Chronic generalized abdominal pain                                                                | R10.84, G89.29         |
| Hypercalciuria                                                                                    | A41.9, N39.0           |
| Urinary tract infection associated with cystostomy catheter, initial encounter                    | T83.510A, N39.0        |
| Flank pain with history of urolithiasis                                                           | R10.9, Z87.442         |
| Fever with sore throat                                                                            | R50.9, J02.9           |
| Dysuria                                                                                           | N39.0, B96.4           |
| Dysuria                                                                                           | J98.9, R50.9           |
| Sepsis due to gram-negative UTI                                                                   | A41.50, N39.0          |
| Bowel and bladder incontinence                                                                    | R32, R15.9             |
| Chronic bilateral lower abdominal pain                                                            | R10.31, G89.29, R10.32 |
| Pain due to retention of urine                                                                    | R33.9, R52             |
| Fever in pediatric patient                                                                        | N39.0, B96.5           |
| Pyelonephritis due to Escherichia coli                                                            | N12, B96.20            |
| Traumatic injury of abdomen with gross hematuria                                                  | S39.91XA, R31.0        |
| Enterococcus UTI                                                                                  | N39.0, B95.2           |
| Postoperative abdominal pain                                                                      | R10.9, G89.18          |
| Bacteriuria with pyuria                                                                           | R82.71, R82.81         |

**Exclusion Diagnosis Codes:**

|                                                        |        |
|--------------------------------------------------------|--------|
| Neurogenic bladder                                     | N31.9  |
| Diaper Candidiasis                                     | B37.2  |
| Candida vaginitis                                      | B37.3  |
| Yeast Infection                                        | B37.9  |
| Diaper Dermatitis                                      | L22    |
| Vesicoureteral reflux w/ scarring                      | N13.70 |
| vesicoureteral reflux without nephropathy              | N13.71 |
| Nephrolithiasis                                        | N 20   |
| bladder calculus                                       | N 21   |
| neuropathic bladder                                    | N 31   |
| retention of urine                                     | N 33   |
| Epididymitis                                           | N45.1  |
| Balanitis                                              | N48.1  |
| Spina Bifida                                           | Q05    |
| Epispadias                                             | Q64.0  |
| Exstrophy of urinary bladder                           | Q64.1  |
| Congenital posterior urethral valves                   | Q64.2  |
| Other atresia and stenosis of urethra and bladder neck | Q64.3  |
| Congenital urethrorectal fistula                       | Q64.73 |
| history of urinary bladder augmentation                | Z96.0  |
| Other inflammation of vagina and vulva                 | N76    |

|                                                  |        |
|--------------------------------------------------|--------|
| Acute vaginitis                                  | N76.0  |
| Subacute and chronic vaginitis                   | N76.1  |
| Acute vulvitis                                   | N76.2  |
| Subacute and chronic vulvitis                    | N76.3  |
| Abscess of vulva                                 | N76.4  |
| Ulceration of vagina                             | N76.5  |
| Ulceration of vulva                              | N76.6  |
| Other specified inflammation of vagina and vulva | N76.8  |
| Mucositis (ulcerative) of vagina and vulva       | N76.81 |
| Other specified inflammation of vagina and vulva | N76.89 |

**Return Visit UTI Diagnosis Codes:**

|                                             |        |
|---------------------------------------------|--------|
| Acute cystitis                              | N30.0  |
| Acute cystitis without hematuria            | N30.00 |
| Acute cystitis with hematuria               | N30.01 |
| Cystitis, unspecified without hematuria     | N30.90 |
| Cystitis, unspecified with hematuria        | N30.91 |
| Urinary tract infection, site not specified | N39.0  |
| Acute pyelonephritis                        | N10    |
