# Supplementary material for: Applying Quality Improvement Methodology to Standardize Pediatric Urinary Tract Infection Diagnosis and Management throughout a Healthcare System
Source: PubMed Central journal article supplement (PMC11338250; doi:10.1097/pq9.0000000000000756), 2024-08-21

### System Wide 14day Return Visits for UTI, P Chart

Percent 14d Return for UTI

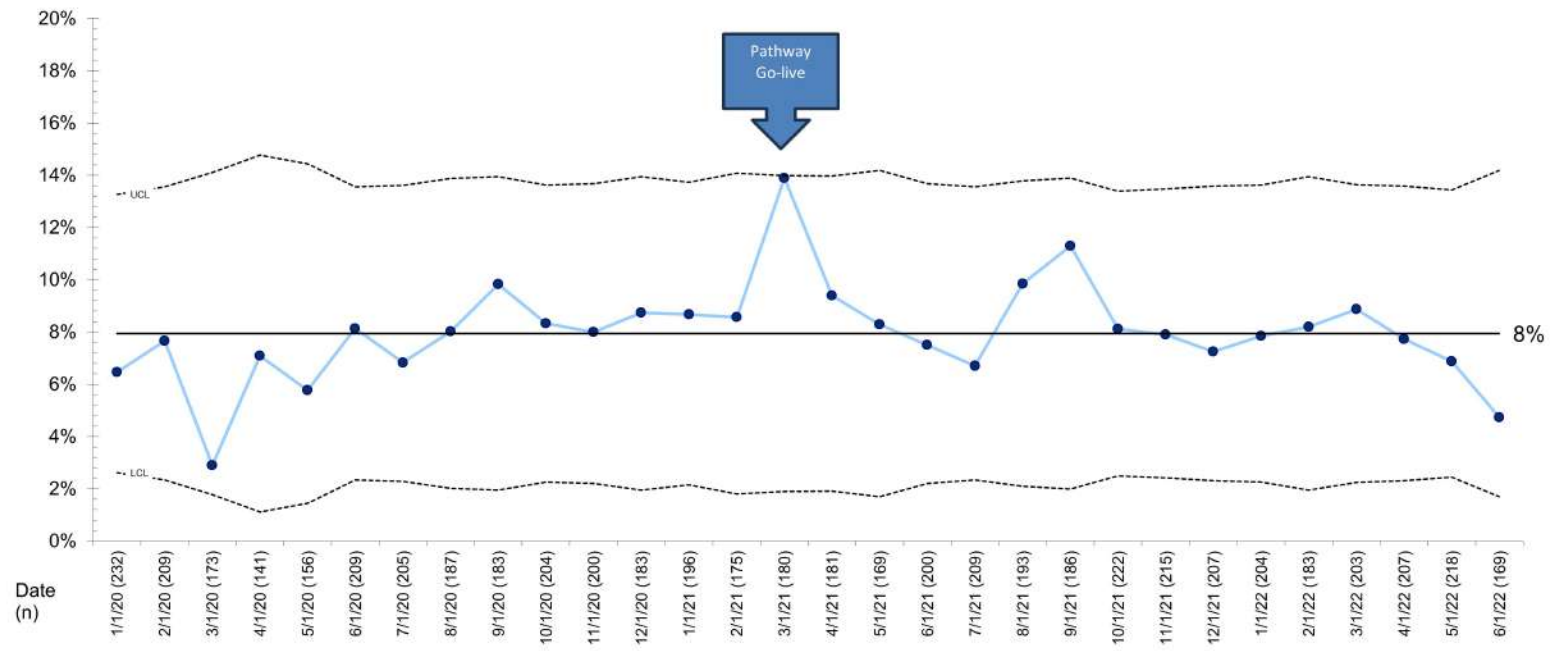

Supplement: pqs-9-e756-s003.pdf [file pqs-9-e756-s003.pdf]
